# Supplementary material
Source: PubMed Central journal article supplement (PMC7116053)
Supplement: EMS94376-supplement-Fig__S1_3__Table_S1_8.pdf [file EMS94376-supplement-Fig__S1_3__Table_S1_8.pdf]

## Supporting Information

### **Inducible expression systems based on xenogeneic silencing and counter-silencing and design of a metabolic toggle switch**

Johanna Wiechert<sup>a</sup>, Cornelia Gätgens<sup>a</sup>, Astrid Wirtz<sup>a</sup>, and Julia Frunzke<sup>a,\*</sup>

<sup>a</sup>Institut für Bio- und Geowissenschaften, IBG-1: Biotechnologie, Forschungszentrum Jülich, Jülich, Germany

\* Address correspondence to Prof. Dr. Julia Frunzke, [j.frunzke@fz-juelich.de](mailto:j.frunzke@fz-juelich.de);

ORCID 0000-0001-6209-7950

## Supplemental figures

### A

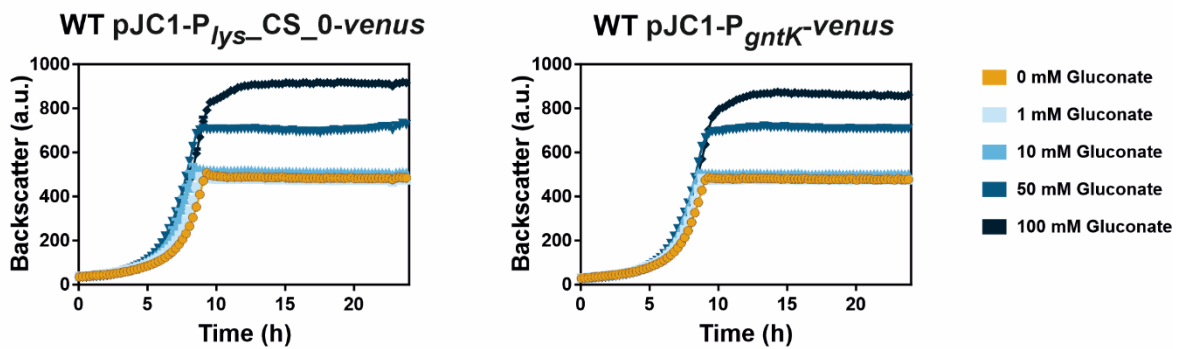

### B

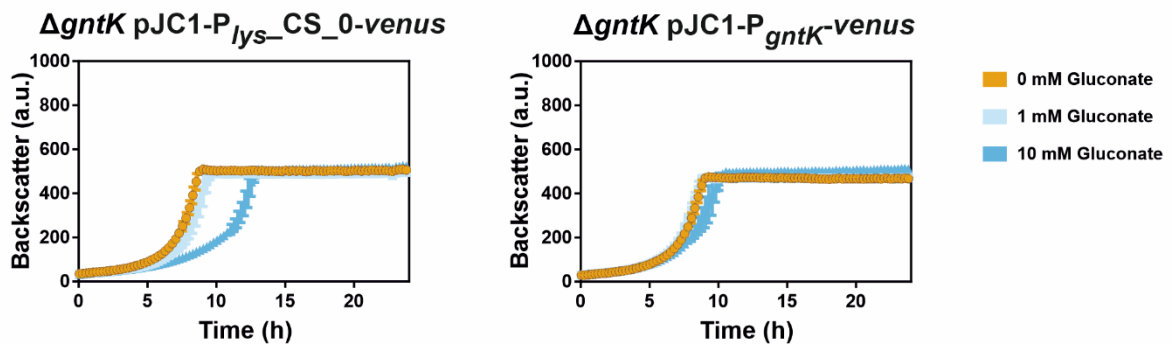

**Figure S1: Growth curves corresponding to the analysis of tunability of the native GntR target promoter  $P_{gntK}$  and the synthetic counter-silencer promoter  $P_{lys\_CS\_0}$  shown in Figure 4.** Shown are backscatter values of *C. glutamicum* wild type cells (WT) (A) or *C. glutamicum* cells lacking the gene encoding the gluconate kinase ( $\Delta$ gntK) (B) harbouring the plasmid-based constructs pJC1-P<sub>lys-CS\_0-venus</sub> or pJC1-P<sub>gntK-venus</sub> during cultivation in the presence of different gluconate concentrations. Graphs show the mean and error bars the standard deviation of biological triplicates over time. Cells were cultivated in a microtiter cultivation system in CGXII medium supplemented with glucose (100 mM in analysis of pJC1-P<sub>gntK-venus</sub> and 111 mM for characterization of pJC1-P<sub>lys-CS\_0-venus</sub>) and either no or varying amounts of gluconate as effector. Backscatter values were measured in 15 min intervals. The presented data show that varying amounts of gluconate affect the final backscatter values but did not significantly influence growth rates of wild-type cells. In contrast,  $\Delta$ gntK cells displayed reduced growth rates upon addition of gluconate.

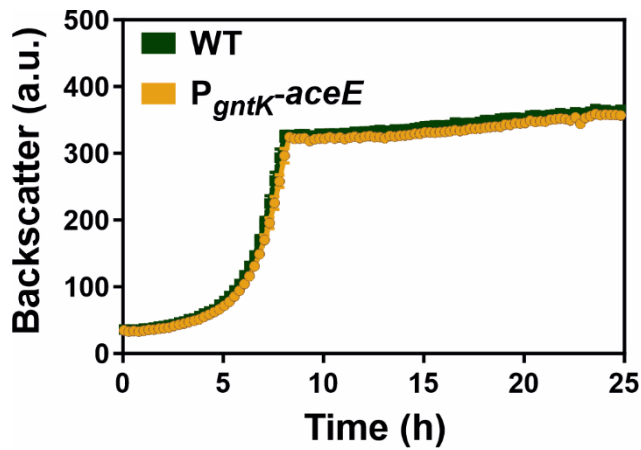

Figure S2: Growth of the strain with dynamically controlled *aceE* expression ( $P_{gntK-aceE}$ ) in comparison to *C. glutamicum* wild type cells, both harbouring the plasmid pJC1- $P_{lys\_CS\_0-venus}$ . Shown are backscatter values of both *C. glutamicum* strains during cultivation in a microtiter cultivation system in CGXII minimal medium with 100 mM gluconate and 25  $\mu$ g/ml kanamycin. Strains have been pre-cultivated in CGXII containing 100 mM gluconate and 111 mM glucose. Graphs show the mean and error bars the standard deviation of biological triplicates over time. Backscatter values were measured in 15 min intervals. This experiment verified that growth of  $P_{gntK-aceE}$  is not impaired in comparison to wild-type cells in the presence of gluconate (100 mM).

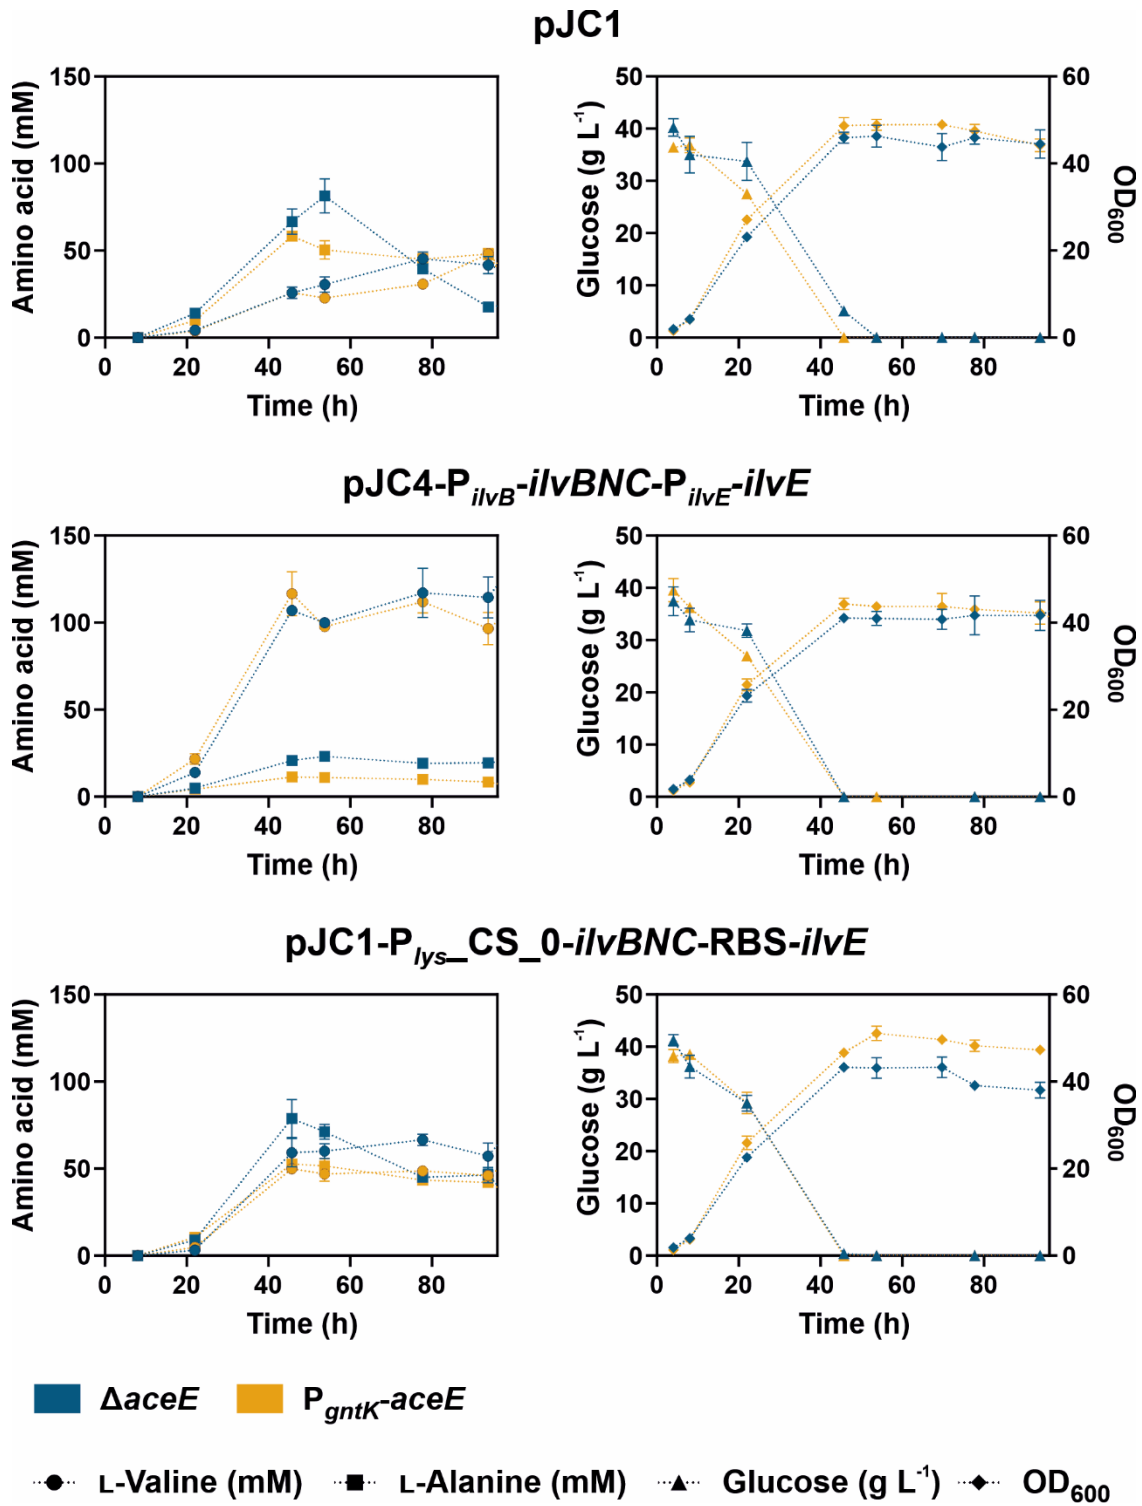

**Figure S3: Growth, glucose consumption, product (L-valine) and by-product (L-alanine) formation during L-valine production.** Cultivation of the strain with dynamically controlled *aceE* expression ( $P_{gntK}$ -*aceE*) in comparison to the previously established  $\Delta aceE$  strain<sup>1,2</sup> harbouring either the empty vector pJC1 (pJC1-*venus-term*), the synthetic L-valine biosynthesis operon controlled by the counter-silencer promoter (pJC1- $P_{lys\_CS\_0}$ -*illvBNC*-RBS-*illvE*) or the native operon structure pJC4- $P_{illvB}$ -*illvBNC*- $P_{illvE}$ -*illvE* (pJC4-*illvBNCE*)<sup>3</sup>. Cultivation was performed in CGXII supplemented with 25  $\mu g/ml$  kanamycin, 222 mM glucose and 254 mM acetate. Graphs represent the values of biological triplicates and error bars the corresponding standard deviations after 8, 22, 46, 54, 78 and 94 h of cultivation. Measurements of glucose and L-valine in the supernatant over time revealed that glucose was completely consumed after 46 hours of cultivation and L-valine concentrations had mostly reached maximal values.

## Supplemental tables

Table S1A: Overview of prices for glucose, gluconate and acetate provided by Sigma-Aldrich (December 2019, <https://www.sigmaaldrich.com>).

| Carbon source<br>(Product ID)          | Purity (%) | Amount (kg) | Price (€) |
|----------------------------------------|------------|-------------|-----------|
| D-Gluconic acid<br>sodium salt (G9005) | ≥99        | 1           | 49.80     |
| D-(+)-Glucose (G8270)                  | ≥99.5      | 1           | 48.50     |
| Potassium acetate<br>(P5708)           | ≥99        | 1           | 119       |

Considered were powders with minimal purity of 99% and an amount of 1 kg. Letter and numbers in brackets are the product numbers.

Table S1B: Overview of costs per litre CGXII minimal medium with different amounts of carbon sources.

| Carbon source<br>(Product ID)                     | Cultivation<br>concentration<br>(mM) | Molecular weight<br>(g mol <sup>-1</sup> ) | Cultivation<br>concentration (g L <sup>-1</sup> ) | Price per L (€) |
|---------------------------------------------------|--------------------------------------|--------------------------------------------|---------------------------------------------------|-----------------|
| D-Gluconic acid<br>sodium salt                    | 51                                   | 218.14                                     | 11.13                                             | 0.55            |
| D-(+)-Glucose                                     | 222                                  | 180.16                                     | 40.0                                              | 1.94            |
| Potassium<br>acetate                              | 254                                  | 98.14                                      | 24.93                                             | 2.97            |
| Potassium<br>acetate +<br>D-(+)-Glucose           | 254 + 222                            |                                            |                                                   | 4.91            |
| D-Gluconic acid<br>sodium salt<br>+ D-(+)-Glucose | 51 + 222                             |                                            |                                                   | 2.49            |

Calculations were performed based on the prices listed in Table S1a.

**Table S2: Strains used in this study.**

| Strain                                          | Relevant characteristics                                                                                                                                                                                                                                                                                                                                 | Reference or source |
|-------------------------------------------------|----------------------------------------------------------------------------------------------------------------------------------------------------------------------------------------------------------------------------------------------------------------------------------------------------------------------------------------------------------|---------------------|
| <b><i>E. coli</i></b>                           |                                                                                                                                                                                                                                                                                                                                                          |                     |
| DH5 $\alpha$                                    | F <sup>-</sup> $\Phi$ 80 <i>lacZ</i> $\Delta$ M15 $\Delta$ ( <i>lacZYA-argF</i> )<br>U169 <i>recA1 endA1 hsdR17</i> (r <sub>k</sub> <sup>-</sup> , m <sub>k</sub> <sup>+</sup> )<br><i>phoA supE44 thi-1 gyrA96 relA1</i> $\lambda$ <sup>-</sup> ,<br>strain used for cloning procedures                                                                 | Invitrogen          |
| <b><i>C. glutamicum</i></b>                     |                                                                                                                                                                                                                                                                                                                                                          |                     |
| ATCC 13032                                      | Biotin-auxotrophic wild type                                                                                                                                                                                                                                                                                                                             | <sup>4</sup>        |
| $\Delta$ <i>aceE</i>                            | Derivate of ATCC 13032 with in-frame deletion of gene <i>aceE</i> (cg2466)                                                                                                                                                                                                                                                                               | <sup>1</sup>        |
| $\Delta$ <i>gntK</i>                            | Derivate of ATCC 13032 with in-frame deletion of gene <i>gntK</i> (cg2732)                                                                                                                                                                                                                                                                               | This work           |
| $\Delta$ P <sub><i>aceE</i></sub> - <i>aceE</i> | Derivate of ATCC 13032 with in-frame deletion of gene <i>aceE</i> (cg2466) and its 300 bp upstream promoter region                                                                                                                                                                                                                                       | This work           |
| P <sub><i>gntK</i></sub> - <i>aceE</i>          | Derivate of $\Delta$ <i>aceE</i> with the re-integrated gene <i>aceE</i> (cg2466) under control of the promoter P <sub><i>gntK</i></sub> . P <sub><i>gntK</i></sub> (303 bp, P <sub>cg2732</sub> ). The first 30 bp of the coding sequence of <i>gntK</i> were fused to the <i>aceE</i> gene via a linker containing a stop codon and an artificial RBS. | This work           |

**Table S3: Plasmids from other studies used in this work.**

| Plasmid                                               | Relevant characteristics                                                                                                                                                                                                                                                                                                                                                              | Reference    |
|-------------------------------------------------------|---------------------------------------------------------------------------------------------------------------------------------------------------------------------------------------------------------------------------------------------------------------------------------------------------------------------------------------------------------------------------------------|--------------|
| pJC1                                                  | <i>Kan</i> <sup>R</sup> , <i>Amp</i> <sup>R</sup> ; <i>oriV</i> <sub>C.g.</sub> , <i>oriV</i> <sub>E.c.</sub> ; <i>C. glutamicum</i> / <i>E. coli</i> shuttle vector                                                                                                                                                                                                                  | <sup>5</sup> |
| pJC1- <i>venus</i> -term                              | <i>Kan</i> <sup>R</sup> , pJC1 derivative carrying the <i>venus</i> coding sequence followed by a terminator sequence of <i>Bacillus subtilis</i>                                                                                                                                                                                                                                     | <sup>6</sup> |
| pJC1-P <sub>cg1897</sub> ::GntR_BS_pos0- <i>venus</i> | <i>Kan</i> <sup>R</sup> ; pJC1- <i>venus</i> -term derivative carrying the CgpS bound area of the promoter of the gene cg1897 (468 bp) with an inserted GntR BS directly upstream of the position of maximal CgpS binding <sup>7</sup> and the first 30 bp of the coding sequence fused to the reporter gene <i>venus</i> via a linker containing a stop codon and an artificial RBS. | <sup>8</sup> |
| pJC1-P <sub>cg1936</sub> ::GntR_BS_pos0- <i>venus</i> | <i>Kan</i> <sup>R</sup> ; pJC1- <i>venus</i> -term derivative carrying the CgpS bound area of the promoter of the gene cg1936 (676 bp) with an inserted GntR BS directly upstream of the position of maximal CgpS binding <sup>7</sup> and the first 30 bp of the coding sequence fused to the                                                                                        | <sup>8</sup> |

|                                                         |                                                                                                                                                                                                                                                                                                                                                                                                                                                                                |   |
|---------------------------------------------------------|--------------------------------------------------------------------------------------------------------------------------------------------------------------------------------------------------------------------------------------------------------------------------------------------------------------------------------------------------------------------------------------------------------------------------------------------------------------------------------|---|
| pJC1-P <sub>cg1940</sub> ::GntR_BS_pos0- <i>venus</i>   | reporter gene <i>venus</i> via a linker containing a stop codon and an artificial RBS.<br><i>Kan<sup>R</sup></i> ; pJC1- <i>venus</i> -term derivative carrying the CgpS bound area of the promoter of the gene cg1940 (563 bp) with an inserted GntR BS directly upstream of the position of maximal CgpS binding <sup>7</sup> and the first 30 bp of the coding sequence fused to the reporter gene <i>venus</i> via a linker containing a stop codon and an artificial RBS. | 8 |
| pJC1-P <sub>cg1955</sub> ::GntR_BS_pos0- <i>venus</i>   | <i>Kan<sup>R</sup></i> ; pJC1- <i>venus</i> -term derivative carrying the CgpS bound area of the promoter of the gene cg1955 (516 bp) with an inserted GntR BS directly upstream of the position of maximal CgpS binding <sup>7</sup> and the first 30 bp of the coding sequence fused to the reporter gene <i>venus</i> via a linker containing a stop codon and an artificial RBS.                                                                                           | 8 |
| pJC1-P <sub>cg1977</sub> ::GntR_BS_pos0- <i>venus</i>   | <i>Kan<sup>R</sup></i> ; pJC1- <i>venus</i> -term derivative carrying the CgpS bound area of the promoter of the gene cg1977 (653 bp) with an inserted GntR BS directly upstream of the position of maximal CgpS binding <sup>7</sup> and the first 30 bp of the coding sequence fused to the reporter gene <i>venus</i> via a linker containing a stop codon and an artificial RBS.                                                                                           | 8 |
| pJC1-P <sub>cg1999</sub> ::GntR_BS_pos-30- <i>venus</i> | <i>Kan<sup>R</sup></i> ; pJC1- <i>venus</i> -term derivative carrying the CgpS bound area of the promoter of the gene cg1999 (448 bp) with an inserted GntR BS 30 bp upstream of the position of maximal CgpS binding <sup>7</sup> and the first 30 bp of the coding sequence fused to the reporter gene <i>venus</i> via a linker containing a stop codon and an artificial RBS.                                                                                              | 8 |
| pJC1-P <sub>cg1999</sub> ::GntR_BS_pos-20- <i>venus</i> | <i>Kan<sup>R</sup></i> ; pJC1- <i>venus</i> -term derivative carrying the CgpS bound area of the promoter of the gene cg1999 (448 bp) with an inserted GntR BS 20 bp upstream of the position of maximal CgpS binding <sup>7</sup> and the first 30 bp of the coding sequence fused to the reporter gene <i>venus</i> via a linker containing a stop codon and an artificial RBS.                                                                                              | 8 |
| pJC1-P <sub>cg1999</sub> ::GntR_BS_pos-10- <i>venus</i> | <i>Kan<sup>R</sup></i> ; pJC1- <i>venus</i> -term derivative carrying the CgpS bound area of the promoter of the gene cg1999 (448 bp) with an inserted GntR BS 10 bp upstream of the position of maximal CgpS binding <sup>7</sup> and the first 30 bp of the coding sequence fused to the reporter gene <i>venus</i> via a linker containing a stop codon and an artificial RBS.                                                                                              | 8 |
| pJC1-P <sub>cg1999</sub> ::GntR_BS_pos-5- <i>venus</i>  | <i>Kan<sup>R</sup></i> ; pJC1- <i>venus</i> -term derivative carrying the CgpS bound area of the promoter of the gene cg1999 (448 bp) with an inserted GntR                                                                                                                                                                                                                                                                                                                    | 8 |

BS 5 bp upstream of the position of maximal CgpS binding <sup>7</sup> and the first 30 bp of the coding sequence fused to the reporter gene *venus* via a linker containing a stop codon and an artificial RBS.

pJC1-P<sub>cg1999</sub>::GntR\_BS\_pos0-*venus* *Kan<sup>R</sup>*; pJC1-*venus*-term derivative carrying the CgpS bound area of the promoter of the gene cg1999 (448 bp) with an inserted GntR BS directly upstream of the position of maximal CgpS binding <sup>7</sup> and the first 30 bp of the coding sequence fused to the reporter gene *venus* via a linker containing a stop codon and an artificial RBS. <sup>8</sup>

pJC1-P<sub>cg1999</sub>::GntR\_BS\_pos+5-*venus* *Kan<sup>R</sup>*; pJC1-*venus*-term derivative carrying the CgpS bound area of the promoter of the gene cg1999 (448 bp) with an inserted GntR BS 5 bp downstream of the position of maximal CgpS binding <sup>7</sup> and the first 30 bp of the coding sequence fused to the reporter gene *venus* via a linker containing a stop codon and an artificial RBS. <sup>8</sup>

pJC1-P<sub>cg1999</sub>::GntR\_BS\_pos+10-*venus* *Kan<sup>R</sup>*; pJC1-*venus*-term derivative carrying the CgpS bound area of the promoter of the gene cg1999 (448 bp) with an inserted GntR BS 10 bp downstream of the position of maximal CgpS binding <sup>7</sup> and the first 30 bp of the coding sequence fused to the reporter gene *venus* via a linker containing a stop codon and an artificial RBS. <sup>8</sup>

pJC1-P<sub>cg2014</sub>::GntR\_BS\_pos0-*venus* *Kan<sup>R</sup>*; pJC1-*venus*-term derivative carrying the CgpS bound area of the promoter of the gene cg2014 (545 bp) with an inserted GntR BS directly upstream of the position of maximal CgpS binding <sup>7</sup> and the first 30 bp of the coding sequence fused to the reporter gene *venus* via a linker containing a stop codon and an artificial RBS. <sup>8</sup>

pJC1-P<sub>cg2020</sub>::GntR\_BS\_pos0-*venus* *Kan<sup>R</sup>*; pJC1-*venus*-term derivative carrying the CgpS bound area of the promoter of the gene cg2020 (390 bp) with an inserted GntR BS directly upstream of the position of maximal CgpS binding <sup>7</sup> and the first 30 bp of the coding sequence fused to the reporter gene *venus* via a linker containing a stop codon and an artificial RBS. <sup>8</sup>

pJC1-P<sub>cg2022</sub>::GntR\_BS\_pos0-*venus* *Kan<sup>R</sup>*; pJC1-*venus*-term derivative carrying the CgpS bound area of the promoter of the gene cg2022 (309 bp) with an inserted GntR BS directly upstream of the position of maximal CgpS binding <sup>7</sup> and the first 30 bp of the coding sequence fused to the reporter gene *venus* via a linker containing a stop codon and an artificial RBS. <sup>8</sup>



|                                                       |                                                                                                                                                                                                                                                                                                                                                                                                 |   |
|-------------------------------------------------------|-------------------------------------------------------------------------------------------------------------------------------------------------------------------------------------------------------------------------------------------------------------------------------------------------------------------------------------------------------------------------------------------------|---|
| pJC1-P <sub>lys</sub> ::GntR_BS_pos-100- <i>venus</i> | <i>Kan<sup>R</sup></i> ; pJC1- <i>venus</i> -term derivative carrying the CgpS bound area of the promoter of the <i>lys</i> gene (cg1974) (444 bp) with an inserted GntR BS 100 bp upstream of the position of maximal CgpS binding <sup>7</sup> and the first 30 bp of the coding sequence fused to the reporter gene <i>venus</i> via a linker containing a stop codon and an artificial RBS. | 8 |
| pJC1-P <sub>lys</sub> ::GntR_BS_pos-25- <i>venus</i>  | <i>Kan<sup>R</sup></i> ; pJC1- <i>venus</i> -term derivative carrying the CgpS bound area of the promoter of the <i>lys</i> gene (cg1974) (444 bp) with an inserted GntR BS 25 bp upstream of the position of maximal CgpS binding <sup>7</sup> and the first 30 bp of the coding sequence fused to the reporter gene <i>venus</i> via a linker containing a stop codon and an artificial RBS.  | 8 |
| pJC1-P <sub>lys</sub> ::GntR_BS_pos-20- <i>venus</i>  | <i>Kan<sup>R</sup></i> ; pJC1- <i>venus</i> -term derivative carrying the CgpS bound area of the promoter of the <i>lys</i> gene (cg1974) (444 bp) with an inserted GntR BS 20 bp upstream of the position of maximal CgpS binding <sup>7</sup> and the first 30 bp of the coding sequence fused to the reporter gene <i>venus</i> via a linker containing a stop codon and an artificial RBS.  | 8 |
| pJC1-P <sub>lys</sub> ::GntR_BS_pos-15- <i>venus</i>  | <i>Kan<sup>R</sup></i> ; pJC1- <i>venus</i> -term derivative carrying the CgpS bound area of the promoter of the <i>lys</i> gene (cg1974) (444 bp) with an inserted GntR BS 15 bp upstream of the position of maximal CgpS binding <sup>7</sup> and the first 30 bp of the coding sequence fused to the reporter gene <i>venus</i> via a linker containing a stop codon and an artificial RBS.  | 8 |
| pJC1-P <sub>lys</sub> ::GntR_BS_pos-10- <i>venus</i>  | <i>Kan<sup>R</sup></i> ; pJC1- <i>venus</i> -term derivative carrying the CgpS bound area of the promoter of the <i>lys</i> gene (cg1974) (444 bp) with an inserted GntR BS 10 bp upstream of the position of maximal CgpS binding <sup>7</sup> and the first 30 bp of the coding sequence fused to the reporter gene <i>venus</i> via a linker containing a stop codon and an artificial RBS.  | 8 |
| pJC1-P <sub>lys</sub> ::GntR_BS_pos-5- <i>venus</i>   | <i>Kan<sup>R</sup></i> ; pJC1- <i>venus</i> -term derivative carrying the CgpS bound area of the promoter of the <i>lys</i> gene (cg1974) (444 bp) with an inserted GntR BS 5 bp upstream of the position of maximal CgpS binding <sup>7</sup> and the first 30 bp of the coding sequence fused to the reporter gene <i>venus</i> via a linker containing a stop codon and an artificial RBS.   | 8 |
| pJC1-P <sub>lys</sub> ::GntR_BS_pos-4- <i>venus</i>   | <i>Kan<sup>R</sup></i> ; pJC1- <i>venus</i> -term derivative carrying the CgpS bound area of the promoter of the <i>lys</i> gene (cg1974) (444 bp) with an inserted GntR BS 4 bp upstream of the position of maximal CgpS binding <sup>7</sup> and the first 30 bp                                                                                                                              | 8 |

of the coding sequence fused to the reporter gene *venus* via a linker containing a stop codon and an artificial RBS.

pJC1-P<sub>lys</sub>::GntR\_BS\_pos-3-*venus* *Kan<sup>R</sup>*; pJC1-*venus*-term derivative carrying the CgpS bound area of the promoter of the *lys* gene (cg1974) (444 bp) with an inserted GntR BS 3 bp upstream of the position of maximal CgpS binding <sup>7</sup> and the first 30 bp of the coding sequence fused to the reporter gene *venus* via a linker containing a stop codon and an artificial RBS. <sup>8</sup>

pJC1-P<sub>lys</sub>::GntR\_BS\_pos-2-*venus* *Kan<sup>R</sup>*; pJC1-*venus*-term derivative carrying the CgpS bound area of the promoter of the *lys* gene (cg1974) (444 bp) with an inserted GntR BS 2 bp upstream of the position of maximal CgpS binding <sup>7</sup> and the first 30 bp of the coding sequence fused to the reporter gene *venus* via a linker containing a stop codon and an artificial RBS. <sup>8</sup>

pJC1-P<sub>lys</sub>::GntR\_BS\_pos-1-*venus* *Kan<sup>R</sup>*; pJC1-*venus*-term derivative carrying the CgpS bound area of the promoter of the *lys* gene (cg1974) (444 bp) with an inserted GntR BS 1 bp upstream of the position of maximal CgpS binding <sup>7</sup> and the first 30 bp of the coding sequence fused to the reporter gene *venus* via a linker containing a stop codon and an artificial RBS. <sup>8</sup>

pJC1-P<sub>lys</sub>\_CS\_0-*venus* *Kan<sup>R</sup>*; pJC1-*venus*-term derivative carrying the CgpS bound area of the promoter of the *lys* gene (cg1974) (444 bp) with an inserted GntR BS directly upstream of the position of maximal CgpS binding <sup>7</sup> and the first 30 bp of the coding sequence fused to the reporter gene *venus* via a linker containing a stop codon and an artificial RBS. <sup>8</sup>

pJC1-P<sub>lys</sub>::GntR\_BS\_pos+1-*venus* *Kan<sup>R</sup>*; pJC1-*venus*-term derivative carrying the CgpS bound area of the promoter of the *lys* gene (cg1974) (444 bp) with an inserted GntR BS 1 bp downstream of the position of maximal CgpS binding <sup>7</sup> and the first 30 bp of the coding sequence fused to the reporter gene *venus* via a linker containing a stop codon and an artificial RBS. <sup>8</sup>

pJC1-P<sub>lys</sub>::GntR\_BS\_pos+2-*venus* *Kan<sup>R</sup>*; pJC1-*venus*-term derivative carrying the CgpS bound area of the promoter of the *lys* gene (cg1974) (444 bp) with an inserted GntR BS 2 bp downstream of the position of maximal CgpS binding <sup>7</sup> and the first 30 bp of the coding sequence fused to the reporter gene *venus* via a linker containing a stop codon and an artificial RBS. <sup>8</sup>

pJC1-P<sub>lys</sub>::GntR\_BS\_pos+3-*venus* *Kan<sup>R</sup>*; pJC1-*venus*-term derivative carrying the CgpS bound area of the promoter of the <sup>8</sup>

|                                                      |                                                                                                                                                                                                                                                                                                                                                                                                      |   |
|------------------------------------------------------|------------------------------------------------------------------------------------------------------------------------------------------------------------------------------------------------------------------------------------------------------------------------------------------------------------------------------------------------------------------------------------------------------|---|
| pJC1-P <sub>lys</sub> ::GntR_BS_pos+4- <i>venus</i>  | <p><i>lys</i> gene (cg1974) (444 bp) with an inserted GntR BS 3 bp downstream of the position of maximal CgpS binding <sup>7</sup> and the first 30 bp of the coding sequence fused to the reporter gene <i>venus</i> via a linker containing a stop codon and an artificial RBS.</p>                                                                                                                | 8 |
| pJC1-P <sub>lys</sub> ::GntR_BS_pos+5- <i>venus</i>  | <p><i>Kan<sup>R</sup></i>; pJC1-<i>venus</i>-term derivative carrying the CgpS bound area of the promoter of the <i>lys</i> gene (cg1974) (444 bp) with an inserted GntR BS 4 bp downstream of the position of maximal CgpS binding <sup>7</sup> and the first 30 bp of the coding sequence fused to the reporter gene <i>venus</i> via a linker containing a stop codon and an artificial RBS.</p>  | 8 |
| pJC1-P <sub>lys</sub> ::GntR_BS_pos+10- <i>venus</i> | <p><i>Kan<sup>R</sup></i>; pJC1-<i>venus</i>-term derivative carrying the CgpS bound area of the promoter of the <i>lys</i> gene (cg1974) (444 bp) with an inserted GntR BS 5 bp downstream of the position of maximal CgpS binding <sup>7</sup> and the first 30 bp of the coding sequence fused to the reporter gene <i>venus</i> via a linker containing a stop codon and an artificial RBS.</p>  | 8 |
| pJC1-P <sub>lys</sub> ::GntR_BS_pos+15- <i>venus</i> | <p><i>Kan<sup>R</sup></i>; pJC1-<i>venus</i>-term derivative carrying the CgpS bound area of the promoter of the <i>lys</i> gene (cg1974) (444 bp) with an inserted GntR BS 10 bp downstream of the position of maximal CgpS binding <sup>7</sup> and the first 30 bp of the coding sequence fused to the reporter gene <i>venus</i> via a linker containing a stop codon and an artificial RBS.</p> | 8 |
| pJC1-P <sub>lys</sub> ::GntR_BS_pos+20- <i>venus</i> | <p><i>Kan<sup>R</sup></i>; pJC1-<i>venus</i>-term derivative carrying the CgpS bound area of the promoter of the <i>lys</i> gene (cg1974) (444 bp) with an inserted GntR BS 15 bp downstream of the position of maximal CgpS binding <sup>7</sup> and the first 30 bp of the coding sequence fused to the reporter gene <i>venus</i> via a linker containing a stop codon and an artificial RBS.</p> | 8 |
| pJC1-P <sub>lys</sub> ::GntR_BS_pos+25- <i>venus</i> | <p><i>Kan<sup>R</sup></i>; pJC1-<i>venus</i>-term derivative carrying the CgpS bound area of the promoter of the <i>lys</i> gene (cg1974) (444 bp) with an inserted GntR BS 20 bp downstream of the position of maximal CgpS binding <sup>7</sup> and the first 30 bp of the coding sequence fused to the reporter gene <i>venus</i> via a linker containing a stop codon and an artificial RBS.</p> | 8 |

|                                                                                                                    |                                                                                                                                                                                                                                                                                                                                                                                                                                                                                            |    |
|--------------------------------------------------------------------------------------------------------------------|--------------------------------------------------------------------------------------------------------------------------------------------------------------------------------------------------------------------------------------------------------------------------------------------------------------------------------------------------------------------------------------------------------------------------------------------------------------------------------------------|----|
| pJC1-P <sub>lys</sub> ::GntR_BS_pos+50- <i>venus</i>                                                               | reporter gene <i>venus</i> via a linker containing a stop codon and an artificial RBS.<br><i>Kan<sup>R</sup></i> ; pJC1- <i>venus</i> -term derivative carrying the CgpS bound area of the promoter of the <i>lys</i> gene (cg1974) (444 bp) with an inserted GntR BS 50 bp downstream of the position of maximal CgpS binding <sup>7</sup> and the first 30 bp of the coding sequence fused to the reporter gene <i>venus</i> via a linker containing a stop codon and an artificial RBS. | 8  |
| pJC1-P <sub>priP</sub> _CS_0- <i>venus</i> (previously named pJC1-P <sub>priP</sub> ::GntR_BS_pos0- <i>venus</i> ) | <i>Kan<sup>R</sup></i> ; pJC1- <i>venus</i> -term derivative carrying the CgpS bound area of the promoter of P <sub>priP</sub> (611 bp) with an inserted GntR BS directly upstream of the position of maximal CgpS binding <sup>7</sup> and the first 30 bp of the coding sequence fused to the reporter gene <i>venus</i> via a linker containing a stop codon and an artificial RBS.                                                                                                     | 8  |
| pJC1-P <sub>gntK</sub> - <i>venus</i>                                                                              | <i>Kan<sup>R</sup></i> ; pJC1- <i>venus</i> -term derivative carrying the P <sub>gntK</sub> promoter (307 bp) (P <sub>cg2732</sub> ) and the first 30 bp of the coding sequence fused to the reporter gene <i>venus</i> via a linker containing a stop codon and an artificial RBS.                                                                                                                                                                                                        | 8  |
| pEC-P <sub>tetR</sub>                                                                                              | <i>Cm<sup>R</sup></i> , pGA1 <i>oriV<sub>Cg</sub></i> , <i>oriV<sub>Ec</sub></i> , <i>tetR</i> , P <sub>tet</sub> ; <i>C. glutamicum</i> / <i>E. coli</i> shuttle vector                                                                                                                                                                                                                                                                                                                   | 9  |
| pEKEx2                                                                                                             | <i>Kan<sup>R</sup></i> , pBL1 <i>oriV<sub>Cg</sub></i> , pUC18 <i>oriV<sub>Ec</sub></i> , <i>lacIq</i> , P <sub>tac</sub> ; <i>C. glutamicum</i> / <i>E. coli</i> shuttle vector                                                                                                                                                                                                                                                                                                           | 10 |
| pK19- <i>mobsacB</i>                                                                                               | <i>Kan<sup>R</sup></i> , <i>oriT</i> , <i>oriV<sub>Ec</sub></i> , <i>sacB</i> , <i>lacZ</i> ; plasmid for allelic exchange in <i>C. glutamicum</i>                                                                                                                                                                                                                                                                                                                                         | 11 |
| pJC1-P <sub>lys</sub> _CS_0- <i>venus</i> -T-P <sub>gntK</sub> - <i>e2-crimson</i>                                 | <i>Kan<sup>R</sup></i> ; pJC1- <i>venus</i> -term derivative carrying the construct P <sub>lys</sub> _CS_0- <i>venus</i> and the oppositely oriented P <sub>gntK</sub> - <i>e2-crimson</i> construct.                                                                                                                                                                                                                                                                                      | 8  |
| pJC4-P <sub>ilvB</sub> - <i>ilvBNC</i> -P <sub>ilvE</sub> - <i>ilvE</i> (previously named pJC4- <i>ilvBNCE</i> )   | <i>Kan<sup>R</sup></i> , P <sub>ilvB</sub> - <i>ilvBNC</i> , P <sub>ilvE</sub> - <i>ilvE</i> (genes encoding the L-valine biosynthesis enzymes acetohydroxyacid synthase, isomeroreductase and transaminase B under control of their native promoters)                                                                                                                                                                                                                                     | 3  |

Table S4: Plasmids constructed in this work.

| Plasmid                                                | Construction                                                                                                                                                      | Relevant characteristics                                                                                                                                                               | Primer used for sequencing |
|--------------------------------------------------------|-------------------------------------------------------------------------------------------------------------------------------------------------------------------|----------------------------------------------------------------------------------------------------------------------------------------------------------------------------------------|----------------------------|
| pJC1-P <sub>priP</sub> ::GntR_BS_pos-100- <i>venus</i> | Gibson assembly: 200/280 (pJC1-P <sub>priP</sub> - <i>venus</i> ) and 279/116 (pJC1-P <sub>priP</sub> - <i>venus</i> ) into pJC1- <i>venus</i> -term *BamHI *BcuI | <i>Kan<sup>R</sup></i> ; pJC1-P <sub>priP</sub> - <i>venus</i> <sup>8</sup> derivative with an inserted GntR BS 100 bp upstream of the position of maximal CgpS binding <sup>7</sup> . | R12, R13                   |

|                                                       |                                                                                                                                                                   |                                                                                                                                                                                                                                                 |                              |
|-------------------------------------------------------|-------------------------------------------------------------------------------------------------------------------------------------------------------------------|-------------------------------------------------------------------------------------------------------------------------------------------------------------------------------------------------------------------------------------------------|------------------------------|
| pJC1-P <sub>priP</sub> ::GntR_BS_pos-50- <i>venus</i> | Gibson assembly: 200/278 (pJC1-P <sub>priP</sub> - <i>venus</i> ) and 277/116 (pJC1-P <sub>priP</sub> - <i>venus</i> ) into pJC1- <i>venus</i> -term *BamHI *BcuI | <i>Kan</i> <sup>R</sup> ; pJC1-P <sub>priP</sub> - <i>venus</i> <sup>8</sup> derivative with an inserted GntR BS 50 bp upstream of the position of maximal CgpS binding <sup>7</sup> .                                                          | R12, R13                     |
| pJC1-P <sub>priP</sub> ::GntR_BS_pos-10- <i>venus</i> | Gibson assembly: 200/276 (pJC1-P <sub>priP</sub> - <i>venus</i> ) and 275/116 (pJC1-P <sub>priP</sub> - <i>venus</i> ) into pJC1- <i>venus</i> -term *BamHI *BcuI | <i>Kan</i> <sup>R</sup> ; pJC1-P <sub>priP</sub> - <i>venus</i> <sup>8</sup> derivative with an inserted GntR BS 10 bp upstream of the position of maximal CgpS binding <sup>7</sup> .                                                          | R12, R13                     |
| pJC1-P <sub>priP</sub> ::GntR_BS_pos-5- <i>venus</i>  | Gibson assembly: 200/288 (pJC1-P <sub>priP</sub> - <i>venus</i> ) and 287/116 (pJC1-P <sub>priP</sub> - <i>venus</i> ) into pJC1- <i>venus</i> -term *BamHI *BcuI | <i>Kan</i> <sup>R</sup> ; pJC1-P <sub>priP</sub> - <i>venus</i> <sup>8</sup> derivative with an inserted GntR BS 5 bp upstream of the position of maximal CgpS binding <sup>7</sup> .                                                           | R12, R13                     |
| pJC1-P <sub>priP</sub> ::GntR_BS_pos+5- <i>venus</i>  | Gibson assembly: 200/290 (pJC1-P <sub>priP</sub> - <i>venus</i> ) and 289/116 (pJC1-P <sub>priP</sub> - <i>venus</i> ) into pJC1- <i>venus</i> -term *BamHI *BcuI | <i>Kan</i> <sup>R</sup> ; pJC1-P <sub>priP</sub> - <i>venus</i> <sup>8</sup> derivative with an inserted GntR BS 5 bp downstream of the position of maximal CgpS binding <sup>7</sup> .                                                         | R12, R13                     |
| pJC1-P <sub>priP</sub> ::GntR_BS_pos+10- <i>venus</i> | Gibson assembly: 200/282 (pJC1-P <sub>priP</sub> - <i>venus</i> ) and 281/116 (pJC1-P <sub>priP</sub> - <i>venus</i> ) into pJC1- <i>venus</i> -term *BamHI *BcuI | <i>Kan</i> <sup>R</sup> ; pJC1-P <sub>priP</sub> - <i>venus</i> <sup>8</sup> derivative with an inserted GntR BS 10 bp downstream of the position of maximal CgpS binding <sup>7</sup> .                                                        | R12, R13                     |
| pJC1-P <sub>priP</sub> ::GntR_BS_pos+50- <i>venus</i> | Gibson assembly: 200/284 (pJC1-P <sub>priP</sub> - <i>venus</i> ) and 283/116 (pJC1-P <sub>priP</sub> - <i>venus</i> ) into pJC1- <i>venus</i> -term *BamHI *BcuI | <i>Kan</i> <sup>R</sup> ; pJC1-P <sub>priP</sub> - <i>venus</i> <sup>8</sup> derivative with an inserted GntR BS 50 bp downstream of the position of maximal CgpS binding <sup>7</sup> .                                                        | R12, R13                     |
| pJC1- <i>tetR</i> -P <sub>tet</sub> - <i>venus</i>    | 547/548 (pEC-P <sub>tetR</sub> ) and 115/116 (pJC1- <i>venus</i> -term) into pJC1- <i>venus</i> -term *BamHI *BcuI                                                | <i>Kan</i> <sup>R</sup> ; pJC1- <i>venus</i> -term derivative carrying the <i>tetR</i> gene and the corresponding P <sub>tet</sub> promoter fused to the reporter gene <i>venus</i> via a linker containing a stop codon and an artificial RBS. | R12, R13, 492                |
| pJC1- <i>lacI</i> -P <sub>tac</sub> - <i>venus</i>    | Gibson assembly: 545/546 (pEKEx2) and 115/116 (pJC1- <i>venus</i> -term) into pJC1- <i>venus</i> -term *BamHI *BcuI                                               | <i>Kan</i> <sup>R</sup> ; pJC1- <i>venus</i> -term derivative carrying the <i>lacI</i> gene and the corresponding P <sub>tac</sub> promoter fused to the reporter gene <i>venus</i> via a linker containing a                                   | R12, R13, 293, 399, 492, 546 |

|                                                     |  |                                                                                                                                                             |                                                                                                                                                                                                                                                                                  |                                                  |
|-----------------------------------------------------|--|-------------------------------------------------------------------------------------------------------------------------------------------------------------|----------------------------------------------------------------------------------------------------------------------------------------------------------------------------------------------------------------------------------------------------------------------------------|--------------------------------------------------|
|                                                     |  |                                                                                                                                                             | stop codon and an artificial RBS.                                                                                                                                                                                                                                                |                                                  |
| pJC1-P <sub>lys_CS_0</sub> -ilvBNC-RBS-ilvE         |  | Gibson assembly: 114/117 (pJC1-P <sub>lys_CS_0</sub> -venus), 349/350 (pJC4-ilvBNCE) and 351/352 (pJC4-ilvBNCE) into pJC1-venus-term *BamHI *BcuI           | Kan <sup>R</sup> , pJC1-venus-term derivative carrying the operon <i>ilvBNC</i> and the gene <i>ilvE</i> (L-valine biosynthesis genes) which were combined in a synthetic operon controlled by the counter-silencer promoter P_CS_0.                                             | R12, R182, R183, R215, 487, 488, 489, 490        |
| pJC1-P <sub>lys_CS_+1</sub> bp down-ilvBNC-RBS-ilvE |  | Gibson assembly: 114/117 (pJC1-P <sub>lys::GntR_BS_pos+1</sub> -venus), 349/350 (pJC4-ilvBNCE) and 351/352 (pJC4-ilvBNCE) into pJC1-venus-term *BamHI *BcuI | Kan <sup>R</sup> , pJC1-venus-term derivative carrying the operon <i>ilvBNC</i> and the gene <i>ilvE</i> (L-valine biosynthesis genes) which were combined in a synthetic operon controlled by the counter-silencer promoter P_CS_+1 bp down (P <sub>lys::GntR_BS_pos+1</sub> ). | R12, R13, 490, 488, 489, 487, 491, 645, 831      |
| pJC1-P <sub>lys_CS_-5</sub> bp up-ilvBNC-RBS-ilvE   |  | Gibson assembly: 114/117 (pJC1-P <sub>lys::GntR_BS_pos-5</sub> -venus), 349/350 (pJC4-ilvBNCE) and 351/352 (pJC4-ilvBNCE) into pJC1-venus-term *BamHI *BcuI | Kan <sup>R</sup> , pJC1-venus-term derivative carrying the operon <i>ilvBNC</i> and the gene <i>ilvE</i> (L-valine biosynthesis genes) which were combined in a synthetic operon controlled by the counter-silencer promoter P_CS_-5 bp up (P <sub>lys::GntR_BS_pos-5</sub> ).   | R12, R13, 490, 488, 489, 487, 491, 645, 831, 171 |
| pK19-mobsacB-ΔgntK                                  |  | Gibson assembly: 207/208 (C. glutamicum genome) and 209/210 (C. glutamicum genome) into pK19-mobsacB *BamHI *EcoRI                                          | Kan <sup>R</sup> , pK19-mobsacB derivative for the chromosomal deletion of the <i>gntK</i> gene (cg2732) (530 bp upstream and 524 bp downstream flanking regions).                                                                                                               | M19, M20                                         |
| pK19-mobsacB-ΔP <sub>aceE</sub> -aceE               |  | Gibson assembly: 62/112 (C. glutamicum genome) and 113/65 (C. glutamicum genome) into pK19-                                                                 | Kan <sup>R</sup> , pK19-mobsacB derivative for the chromosomal deletion of the <i>aceE</i> gene (cg2466) and its 300 bp upstream promoter region (501 bp                                                                                                                         | M19, M20                                         |

|                                                              |                                                                                                                                                                                                                                             |                                                                                                                                                                                                                                                      |                                                                                                                                                                                                                                                                                                                                             |
|--------------------------------------------------------------|---------------------------------------------------------------------------------------------------------------------------------------------------------------------------------------------------------------------------------------------|------------------------------------------------------------------------------------------------------------------------------------------------------------------------------------------------------------------------------------------------------|---------------------------------------------------------------------------------------------------------------------------------------------------------------------------------------------------------------------------------------------------------------------------------------------------------------------------------------------|
|                                                              | <i>mobsacB</i><br>*EcoRI                                                                                                                                                                                                                    | *BamHI                                                                                                                                                                                                                                               | upstream and 500 bp<br>downstream flanking<br>regions).                                                                                                                                                                                                                                                                                     |
| pK19- <i>mobsacB</i> -P <sub><i>gntK</i></sub> - <i>aceE</i> | Gibson<br>62/63<br><i>glutamicum</i><br>genome), 97/92 ( <i>C.</i><br><i>glutamicum</i><br>genome), 70/71 ( <i>C.</i><br><i>glutamicum</i><br>genome) and 64/65<br>( <i>C. glutamicum</i><br>genome) into pK19-<br><i>mobsacB</i><br>*EcoRI | assembly:<br>( <i>C.</i><br><i>glutamicum</i><br>genome), 97/92 ( <i>C.</i><br><i>glutamicum</i><br>genome), 70/71 ( <i>C.</i><br><i>glutamicum</i><br>genome) and 64/65<br>( <i>C. glutamicum</i><br>genome) into pK19-<br><i>mobsacB</i><br>*BamHI | <i>Kan</i> <sup>R</sup> , pK19- <i>mobsacB</i><br>derivative for the<br>chromosomal<br>integration of the <i>aceE</i><br>gene (cg2466) und<br>control of the P <sub><i>gntK</i></sub><br>promoter (333 bp,<br>P <sub>cg2732</sub> ) (501 bp<br>upstream and 500 bp<br>downstream flanking<br>regions).<br>M19, M20, 93,<br>94, 95, 101, 102 |

Oligonucleotide pairs used for PCR are given as numbers (Table S5) with DNA templates indicated in brackets behind. The used backbones including the restriction enzymes used for linearization are listed behind (\*). Used primers for sequencing are listed in Table S6.

**Table S5: Oligonucleotides used for plasmid constructions.**

| Oligonucleotide number | Sequence (5' → 3')                                   |
|------------------------|------------------------------------------------------|
| 279                    | CGCTCGATATGATAGTACCAATTCACGTGCAGCAGCACTCCC           |
| 280                    | GAATTGGTACTATCATATCGAGCGTTACGAACCATAACTG             |
| 277                    | GTGCACGTGTATGATAGTACCAATCAACTGTGCGCTAAATGCGTC        |
| 278                    | CACAGTTGATTGGTACTATCATAACGTGCACACATATGCGCG           |
| 275                    | GTTTTATGATAGTACCAATCTTTATTACTAAGCTTGTTAAATTGAAAC     |
| 276                    | GTAATAAAGATTGGTACTATCATAAACTCAACGGTTTATTAAGACGC      |
| 287                    | CTTTATATGATAGTACCAATTTACTAAGCTTGTTAAATTGAAAC         |
| 288                    | GTAAATTGGTACTATCATATAAAGAACTCAACGGTTTATTAAG          |
| 289                    | CTAAGCTTATGATAGTACCAATTGTTAAATTGAAACTTCGTTATATTC     |
| 290                    | CAATTGGTACTATCATAAAGCTTAGTAATAAAGAACTCAACGG          |
| 281                    | GCTTGTTTTATGATAGTACCAATAAATTGAAACTTCGTTATATTCTG      |
| 282                    | GTTTCAATTTATTGGTACTATCATAAAACAAGCTTAGTAATAAAGAAAC    |
| 283                    | GAAAGTAAGTTATGATAGTACCAATAATTAAGTACTTCGGCTCCACG      |
| 284                    | CTTAATTATTGGTACTATCATAACTTACTTTCTTTAATCAGAATATAAC    |
| 285                    | CTTTACTATATGATAGTACCAATAGCTTGTTAAATTGAAACTTCG        |
| 286                    | CAAGCTATTGGTACTATCATATAGTAATAAAGAACTCAACGG           |
| 547                    | AGCGACGCCGAGGGGATCCTTAAGACCACTTTCACATTTAAGTTGTTTTTC  |
| 548                    | ATGATATCTCCTTCTTAAAGTTCAGTGTATCAACAAGCTGGGGATCTTAAGC |
| 115                    | TGAACCTTAAGAAGGAGATATCATATGGTGAGCAAGGGCGAGGAG        |
| 116                    | AAAACGACGGCCAGTACTAGTTACTTGTACAGCTCGTCCATGCC         |
| 545                    | AGCGACGCCGAGGGGATCCTCAAGCCTTCGTCCTGTTCC              |
| 546                    | ATGATATCTCCTTCTTAAAGTTCAGGATCCTCTAGAGTCGACCTGC       |
| 114                    | TGATATCTCCTTCTTAAAGTTCATTTTTCGGCATTGCGCCTTTAATCGC    |
| 117                    | AGCGACGCCGAGGGGATCCGCTCAAGGAAGAGTTCTTCATTGGTC        |

|     |                                                                    |
|-----|--------------------------------------------------------------------|
| 349 | TGAACTTTAAGAAGGAGATATCATGTGAATGTGGCAGCTTCTCAAC                     |
| 350 | ATGTATATCTCCTCTTAAAGTTAAACAAAATTATTTCTAGTTTAAGCGGTTTCTGCG<br>CGAGC |
| 351 | GTTTAACTTTAAGAAGGAGATATACATGTGTATCTGTCAGGTAGCAGG                   |
| 352 | AAAACGACGGCCAGTACTAGTTAGCCAACCAGTGGGTAAAGC                         |
| 207 | CAGGTCGACTCTAGAGGATCATGGTGGCGTCATGCTCGGC                           |
| 208 | GTCTGTAACCGAGCATCTCTCCTAGACAATATGTAAGCCTTCGGCTG                    |
| 209 | GAGAGATGCTCGGTTACAGACGCAGAGTGGGTTGCAACAAATAA                       |
| 210 | GTTGTAAAACGACGGCCAGTGAATTGCAGGTCGAGTTCTCCACAG                      |
| 62  | CAGGTCGACTCTAGAGGATCTCGATGGACTCGCTGATCAGC                          |
| 112 | GTCTGTAACCGAGCATCTCTCAAAGAATTATCGGGTAGTTTCCCGC                     |
| 113 | GAGAGATGCTCGGTTACAGACATCACCTCAAGGGACAGATAAATCC                     |
| 65  | GTTGTAAAACGACGGCCAGTGAATTCCGTGAGCAATTCAAGCAGGAAC                   |
| 63  | GGACGAGCTGTACAAGTAACTAGTAAAGAATTATCGGGTAGTTTCCCGC                  |
| 97  | CTAGTTTACTTGTACAGCTCGTCCGAGGATCGTCTCCGCGAAGAG                      |
| 92  | CATTTCCACACCTCCTGTTGGGTGACAATATGTAAGCCTTCGGCTGC                    |
| 70  | GACCCAACAGGAGGTGTGGAAATGGCCGATCAAGCAAACTTGGTG                      |
| 71  | GGATTTATCTGTCCCTTGAGGTGATTTATTCCTCAGGAGCGTTTGGATC                  |
| 64  | GATCCAACGCTCCTGAGGAATAATCACCTCAAGGGACAGATAAATCC                    |

Table S6: Oligonucleotides used for plasmid sequencing.

| Oligonucleotide number | Sequence (5'→3')                                  |
|------------------------|---------------------------------------------------|
| M19                    | CGCCAGGGTTTTCCAGTCAC                              |
| M20                    | AGCGGATAACAATTTACACAGGA                           |
| R12                    | CAGGGACAAGCCACCCGCACA                             |
| R13                    | GGAAGCTAGAGTAAGTAGTTCGC                           |
| R182                   | CGATTCCTATGGACCCTGCCACC                           |
| R183                   | GGTGGCAGGCTCCATAGGAATCG                           |
| R215                   | CTGCGTTCTGATTTAATCTGTATCAGG                       |
| 93                     | CTCTGGCAGGTAGCCACCG                               |
| 94                     | CTGCCAGAGCGTCGTGAGAAC                             |
| 95                     | CACACCACGGGACTGTGG                                |
| 101                    | CTATGGAACCTGAATTCACAGGC                           |
| 102                    | CTTCAGGTGCCTCACGGTAGG                             |
| 171                    | GATACTTATGATAGTACCAATAGAGTTTAATTTGTAGTATCCAGGGAAC |
| 293                    | CGCCGCTTCCACTTTTTCCCG                             |
| 399                    | CACCAAACGTTTCGGCGAGAAGC                           |
| 487                    | GGTCAACGATGAGCTTGAGCTC                            |
| 488                    | CTGCTGGAAACCACCAAGGC                              |
| 489                    | CACTCGGATTGCGCCCATTC                              |
| 490                    | GCCACATTTGGTGCTGGCC                               |
| 492                    | CTCGAACTTCACCTCGGCGC                              |
| 546                    | ATGATATCTCCTTCTTAAAGTTCAGGATCCTCTAGAGTCGACCTGC    |
| 645                    | TGCCATACGCGCGATTCTATGGATCCTGCCACCACCGTATTCCTACTAC |
| 831                    | CATGAGGTCGCGGAGCTTAG                              |



Table S7: Oligonucleotides used for sequencing of chromosomal modifications.

| Strain                 | Oligonucleotide number | Sequence (5' → 3')      |
|------------------------|------------------------|-------------------------|
| $\Delta gntK$          | 313                    | GCCCACTGCTCAGCGATTTTC   |
|                        | 314                    | CGGGGTCGAGTTCTTTGATCC   |
| $\Delta P_{aceE-aceE}$ | 104                    | CCAGGGCTCCTTCTTTACCAATG |
|                        | 105                    | CGTTCTCCCCGGCACTGTG     |
| $P_{gntK-aceE}$        | 93                     | CTCTGGCAGGTAGCCACCG     |
|                        | 94                     | CTGCCAGAGCGTCGTGAGAAC   |
|                        | 95                     | CACACCACGGGGACTGTGG     |
|                        | 101                    | CTATGGAACCTGAATCCCAGGC  |
|                        | 104                    | CCAGGGCTCCTTCTTTACCAATG |
|                        | 105                    | CGTTCTCCCCGGCACTGTG     |

Table S8: Oligonucleotides used for quantitative Real-time PCR (qRT-PCR).

| Target gene  | Oligo-nucleotide number | Sequence (5' → 3')     |
|--------------|-------------------------|------------------------|
| <b>venus</b> | 554                     | GCGCACCATCTTCTTCAAGG   |
|              | 555                     | CGGCGGTGATATAGACGTTGTG |
| <b>ddh</b>   | 558                     | AGCAGGTATGGAGCAACTTCG  |
|              | 559                     | TGATTACCACCGGCGACAC    |

## References

- Schreiner, M. E., Fiur, D., Holátko, J., Pátek, M., and Eikmanns, B. J. (2005) E1 enzyme of the pyruvate dehydrogenase complex in *Corynebacterium glutamicum*: molecular analysis of the gene and phylogenetic aspects. *J. Bacteriol.* *187*, 6005-6018.
- Blombach, B., Schreiner, M. E., Holátko, J., Bartek, T., Oldiges, M., and Eikmanns, B. J. (2007) L-valine production with pyruvate dehydrogenase complex-deficient *Corynebacterium glutamicum*. *Appl. Environ. Microbiol.* *73*, 2079-2084.
- Radmacher, E., Vaitsikova, A., Burger, U., Krumbach, K., Sahm, H., and Eggeling, L. (2002) Linking central metabolism with increased pathway flux: L-valine accumulation by *Corynebacterium glutamicum*. *Appl. Environ. Microbiol.* *68*, 2246-2250.
- Kinoshita, S., Udaka, S., and Shimono, M. (1957) Studies on the amino acid fermentation. Part 1. Production of L-glutamic acid by various microorganisms. *J. Gen. Appl. Microbiol.* *3*, 193-205.
- Cremer, J., Eggeling, L., and Sahm, H. (1990) Cloning the *dapA dapB* cluster of the lysine-secreting bacterium *Corynebacterium glutamicum*. *Mol. Gen. Genet.* *220*, 478-480.
- Baumgart, M., Unthan, S., Rückert, C., Sivalingam, J., Grünberger, A., Kalinowski, J., Bott, M., Noack, S., and Frunzke, J. (2013) Construction of a prophage-free variant of *Corynebacterium glutamicum* ATCC 13032 for use as a platform strain for basic research and industrial biotechnology. *Appl. Environ. Microbiol.* *79*, 6006-6015.
- Pfeifer, E., Hünnefeld, M., Popa, O., Polen, T., Kohlheyer, D., Baumgart, M., and Frunzke, J. (2016) Silencing of cryptic prophages in *Corynebacterium glutamicum*. *Nucleic Acids Res.* *44*, 10117-10131.
- Wiechert, J., Filipchuk, A., Hünnefeld, M., Gätgens, C., Brehm, J., Heermann, R., and Frunzke, J. (2020) Deciphering the rules underlying xenogeneic silencing and counter-

silencing of Lsr2-like proteins using CgpS of *Corynebacterium glutamicum* as a model. *mbio* 11, e02273-02219.

9. Huber, I., Palmer, D. J., Ludwig, K. N., Brown, I. R., Warren, M. J., and Frunzke, J. (2017) Construction of recombinant Pdu metabolosome shells for small molecule production in *Corynebacterium glutamicum*. *ACS Synth. Biol.* 6, 2145-2156.
10. Eikmanns, B. J., Thum-Schmitz, N., Eggeling, L., Ludtke, K. U., and Sahm, H. (1994) Nucleotide sequence, expression and transcriptional analysis of the *Corynebacterium glutamicum* gltA gene encoding citrate synthase. *Microbiology (Reading, U. K.)* 140, 1817-1828.
11. Schäfer, A., Tauch, A., Jäger, W., Kalinowski, J., Thierbach, G., and Pühler, A. (1994) Small mobilizable multi-purpose cloning vectors derived from the *Escherichia coli* plasmids pK18 and pK19: selection of defined deletions in the chromosome of *Corynebacterium glutamicum*. *Gene* 145, 69-73.
